# Supplementary material for: The effects of soil drought stress on growth characteristics, root system, and tissue anatomy of Pinus sylvestris var. mongolica
Source: PeerJ. 2023 Jan 9;11:e14578. doi: 10.7717/peerj.14578 (PMC9835711; doi:10.7717/peerj.14578)
Supplement: Data S1 [file peerj-11-14578-s001.xlsx]

## Sheet: Sheet1
Seedling height
Time(week)	CK					MD					HD
1	4.1	5	5.6	6.2	6.2	5.4	6.2	4.9	5	6.2	4.7	5.7	6.1	5.8	4.8
2	4.8	5.7	6.4	6.8	6.5	5.9	6.4	5.3	5.3	6.6	5.5	6.2	6.2	5.9	5.2
3	5.6	6.3	7	7.3	7.2	6.1	6.7	5.5	5.8	7	5.8	6.5	6.5	6.1	5.5
4	5.9	6.9	7.4	7.9	8.1	6.6	7.1	6	6.3	7.5	6.1	6.8	6.7	6.3	5.8
5	6.4	7.4	8	8.4	8.5	7	7.4	6.3	7	7.8	6.4	7	7	6.6	6.2
6	7.1	8.2	8.6	8.9	8.9	7.6	7.6	6.8	7.6	8.2	6.6	7.2	7.3	6.8	6.5
7	7.5	8.5	9	9.5	9.3	7.9	7.8	7	7.8	8.5	6.7	7.3	7.4	7	6.7
8	7.6	8.7	9.3	9.8	9.5	8.2	8	7.4	8	8.7	6.9	7.5	7.4	7.1	6.8
Ground diameter
Time(week)	CK					MD					HD
1	4.1	5	5.6	6.2	6.2	5.4	6.2	4.9	5	6.2	4.7	5.7	6.1	5.8	4.8
2	4.8	5.7	6.4	6.8	6.5	5.9	6.4	5.3	5.3	6.6	5.5	6.2	6.2	5.9	5.2
3	5.6	6.3	7	7.3	7.2	6.1	6.7	5.5	5.8	7	5.8	6.5	6.5	6.1	5.5
4	5.9	6.9	7.4	7.9	8.1	6.6	7.1	6	6.3	7.5	6.1	6.8	6.7	6.3	5.8
5	6.4	7.4	8	8.4	8.5	7	7.4	6.3	7	7.8	6.4	7	7	6.6	6.2
6	7.1	8.2	8.6	8.9	8.9	7.6	7.6	6.8	7.6	8.2	6.6	7.2	7.3	6.8	6.5
7	7.5	8.5	9	9.5	9.3	7.9	7.8	7	7.8	8.5	6.7	7.3	7.4	7	6.7
8	7.6	8.7	9.3	9.8	9.5	8.2	8	7.4	8	8.7	6.9	7.5	7.4	7.1	6.8
Fresh weight
Primary root				Lateral root				Stem				Leaves
CK	MD	HD		CK	MD	HD		CK	MD	HD		CK	MD	HD
0.23	0.15	0.11		0.88	0.57	0.24		0.45	0.33	0.29		1.32	1.34	0.79
0.25	0.18	0.09		0.68	0.61	0.36		0.43	0.35	0.25		1.43	1.32	0.71
0.32	0.19	0.08		0.76	0.43	0.26		0.45	0.32	0.29		1.39	1.29	0.72
0.29	0.15	0.12		0.78	0.55	0.39		0.49	0.33	0.23		1.38	1.22	0.69
0.28	0.16	0.12		0.91	0.48	0.41		0.39	0.3	0.22		1.58	0.99	0.55
0.33	0.21	0.13		0.79	0.52	0.37		0.41	0.36	0.28		1.29	1.11	0.62
Dry weight
Primary root				Lateral root				Stem				Leaves
CK	MD	HD		CK	MD	HD		CK	MD	HD		CK	MD	HD
0.08	0.07	0.07		0.24	0.2	0.13		0.45	0.33	0.29		1.32	1.34	0.79
0.1	0.09	0.06		0.18	0.18	0.17		0.43	0.35	0.25		1.43	1.32	0.71
0.12	0.1	0.05		0.24	0.18	0.15		0.45	0.32	0.29		1.39	1.29	0.72
0.1	0.07	0.07		0.21	0.17	0.16		0.49	0.33	0.23		1.38	1.22	0.69
0.11	0.08	0.08		0.24	0.19	0.18		0.39	0.3	0.22		1.58	0.99	0.55
0.13	0.11	0.08		0.21	0.21	0.17		0.41	0.36	0.28		1.29	1.11	0.62
Chlorophyll content
Chla				Chlb				Chla/b
CK	MD	HD		CK	MD	HD		CK	MD	HD
4.62	4.12	2.31		1.72	1.56	0.91		2.68605	2.64103	2.53846
4.95	3.84	1.89		1.78	1.39	0.85		2.7809	2.76259	2.22353
4.96	3.91	1.45		1.81	1.42	0.61		2.74033	2.75352	2.37705
stomatal density
CK	MD	HD
95	101	93
90	99	94
94	92	90
92	97	89
93	94	84
Length				SurfArea				Root Volume				Average diameter
CK	MD	HD		CK	MD	HD		CK	MD	HD		CK	MD	HD
921.177	752.672	646.94		575.994	540.864	523.317		35.66	30.929	20.686		2.8748	2.2873	1.9903
890.672	822.539	683.777		591.004	522.386	521.328		33.86	29.882	21.63		2.9269	2.671	1.5506
882.71	855.291	612.541		559.218	548.741	528.179		32.646	28.016	20.682		2.8236	2.622	2.1675
LenPerVol				Tips				Forks				Crossings
CK	MD	HD		CK	MD	HD		CK	MD	HD		CK	MD	HD
921.177	752.672	646.94		4535	4091	3373		9478	7907	7013		1197	919	781
862.672	722.539	683.777		4278	3974	3694		9660	7603	7422		1163	847	762
882.71	815.291	701.541		4182	3840	3535		8835	8247	7140		989	971	811
